# Supplementary material
Source: Royal Society of Chemistry journal article supplement (doi:10.1039/d6dt00262e)
Supplement: d6dt00262e1.pdf [file d6dt00262e1.pdf]

Supplementary Information

**New insights into the photocatalytic properties of composites based on TiO<sub>2</sub> and single-walled carbon nanotubes**

Adelina Udrescu<sup>a</sup>, Ion Smaranda<sup>a</sup>, Radu Cercel<sup>a</sup>, Andreea Androne<sup>a,b</sup>, Andreea Nila<sup>a</sup>, Elena Matei<sup>a</sup>, Ionel Mercioniu<sup>a</sup>, Stefano Bellucci<sup>a</sup>, Mihaela Baibarac<sup>\*a</sup>

<sup>a</sup>*National Institute of Materials Physics, Laboratory of Optical Processes in Nanostructured Materials, Atomistilor street 405A, Magurele, Romania.*

<sup>b</sup>*University of Bucharest, Faculty of Physics, Atomistilor Street 405, Magurele, Romania.*

Corresponding author: Dr. M. Baibarac

*E-mail:* [barac@infim.ro](mailto:barac@infim.ro)

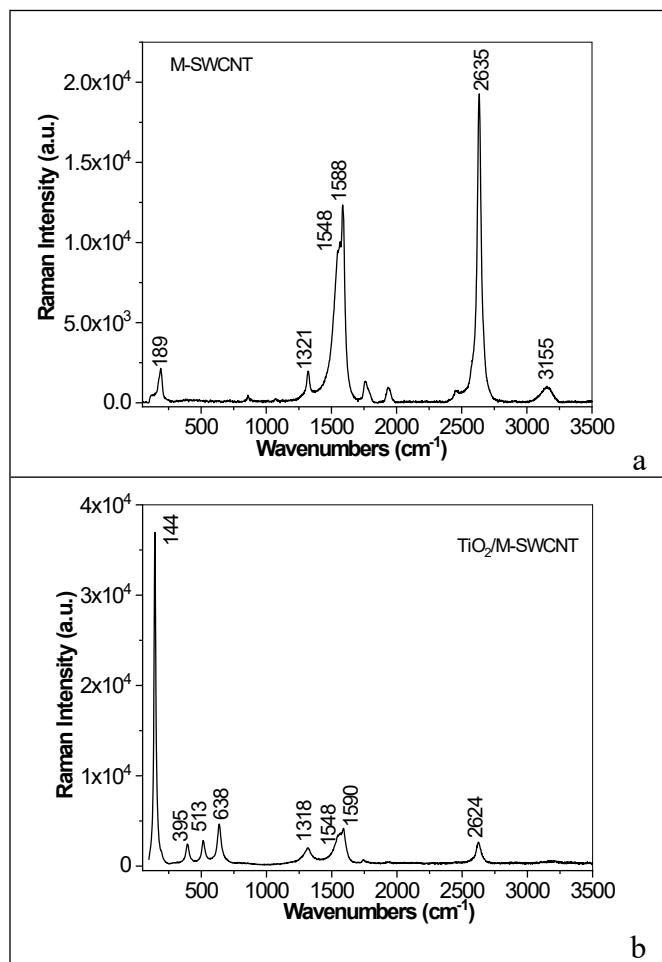

**Figure S1.** Raman spectra of M-SWCNT (a) and the TiO<sub>2</sub>/M-SWCNT composite with 1Wt.% M-SWCNT (b). The excitation wavelength is 633 nm.

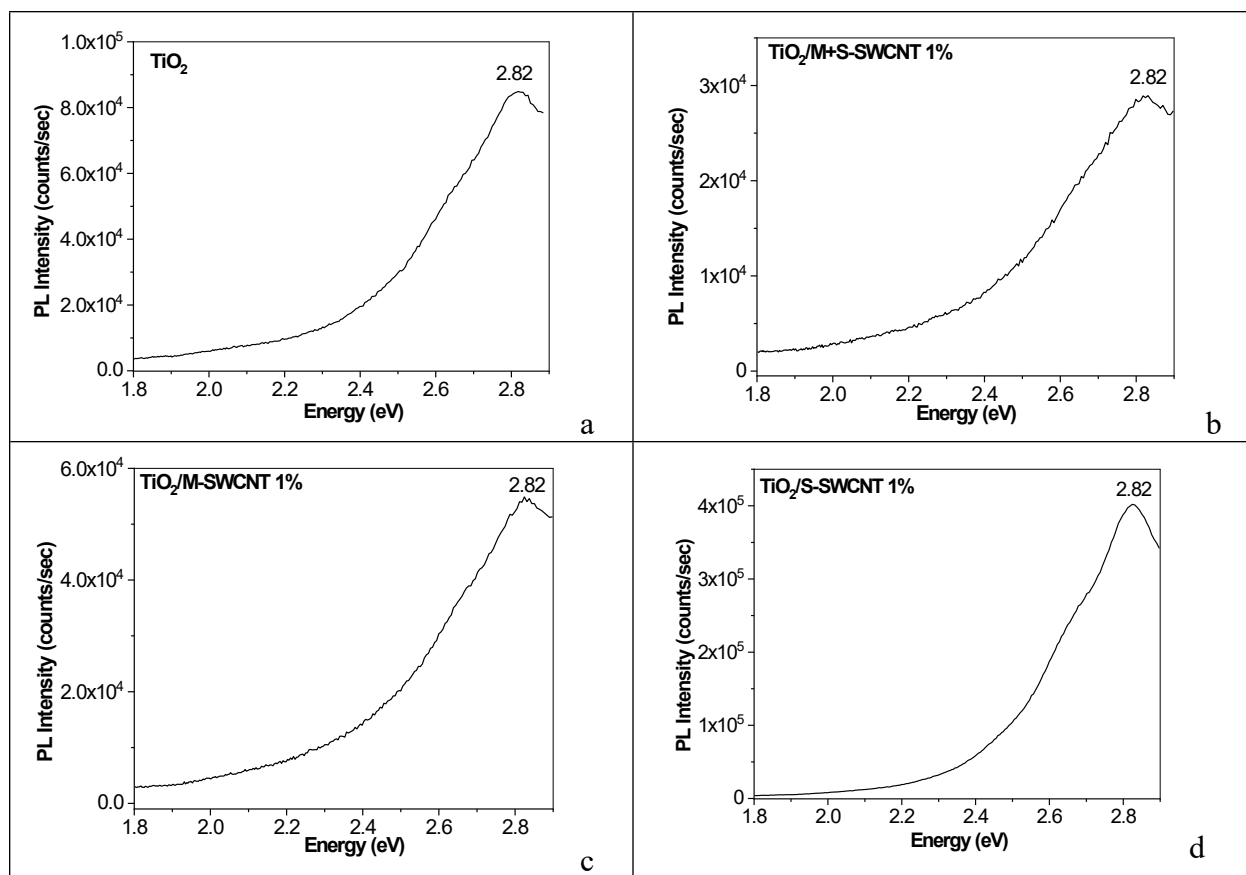

**Figure S2.** PL spectra of  $\text{TiO}_2$  (a) and composites  $\text{TiO}_2/\text{M+S-SWCNT}$  (b),  $\text{TiO}_2/\text{M-SWCNT}$  (c) and  $\text{TiO}_2/\text{S-SWCNT}$  (d), with a concentration of carbon nanotubes in each sample equal to 1 wt.%. The excitation wavelength is 360 nm.

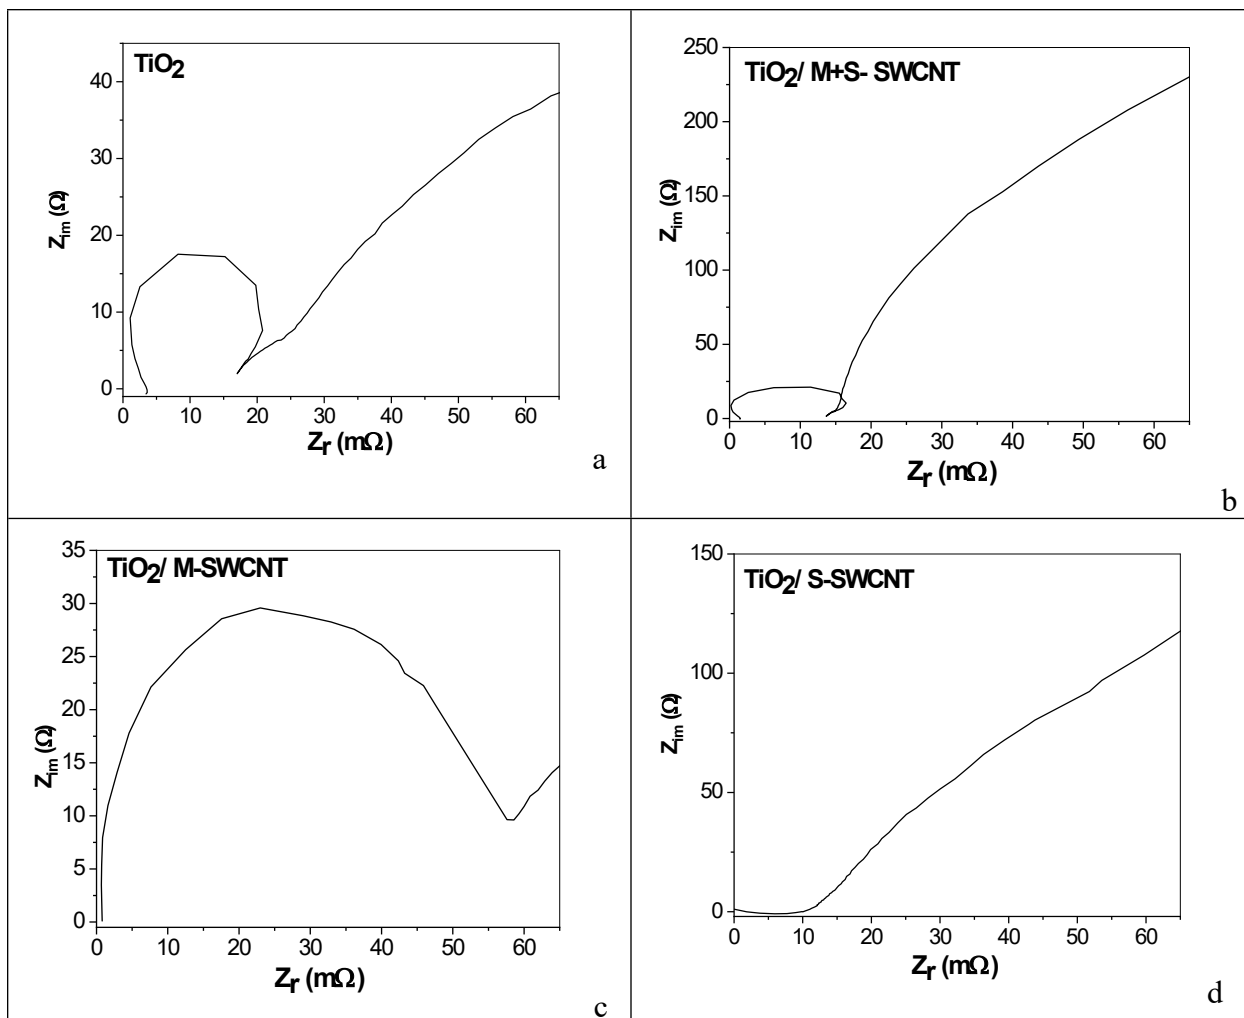

**Figure S3.** Nyquist plots of  $TiO_2$  (a) and composites  $TiO_2/M+S-SWCNT$  (b),  $TiO_2/M-SWCNT$  (c), and  $TiO_2/S-SWCNT$  (d), with a concentration of carbon nanotubes in each sample equal to 1 wt.%.

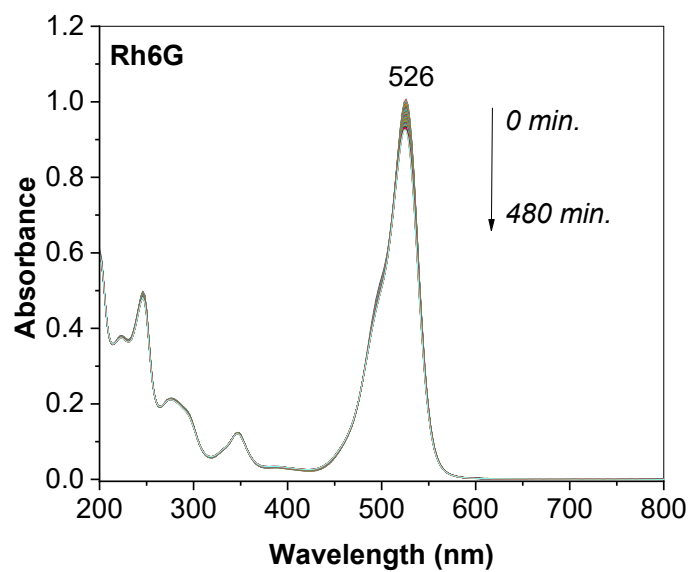

**Figure S4.** Evolution of the UV-VIS spectra of the 0.1 mM Rh6G solution during exposure to light emitted by a halogen lamp.
